# Supplementary material for: Ice sheet mass loss caused by dust and black carbon accumulation
Source: Copernicus journal article supplement (doi:10.5194/tc-9-1845-2015), 2015-09-22
Supplement: Supplementary file 2 [file tc-9-1845-2015-supplement.zip]

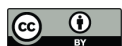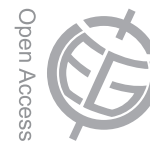

## *Supplement of*

# **Ice sheet mass loss caused by dust and black carbon accumulation**

**T. Goelles et al.**

*Correspondence to:* T. Goelles (thomas.golles@unis.no, thomas.goelles@gmail.com)

- tc-9-1845-2015-supplement-title-page.pdf
- README\_for\_S4cdf
- S4.cdf
- \_\_MACOSX
  - .\_README\_for\_S4cdf
  - .\_S4.cdf
  - .\_supplement.pdf
- supplement.pdf

The copyright of individual parts of the supplement might differ from the CC-BY 3.0 licence.
